# Supplementary material for: Information content differentiates enhancers from silencers in mouse photoreceptors
Source: eLife. 2021 Sep 6;10:e67403. doi: 10.7554/eLife.67403 (PMC8492058; doi:10.7554/eLife.67403)
Supplement: Supplementary file 6. [file elife-67403-supp6.xlsx]

## Sheet: Sheet1
Name	Sequence	Description
MO563	GTAGCGTCTGTCCGTGAATT	5' primer for amplifying Agilent oligo libraries
MO564	CTGTAGTAGTAGTTGGCGGC	3' primer for amplifying Agilent oligo libraries
MO566	TCTAGCTAGCATGTCACCTTGGCCCC	5' primer for amplifying Rhomin_DsRed and adding NheI flanking
MO567	AACATGCATGCCTACAGGAACAGGTGGTGG	3' primer for amplifying promoter and DsRed and adding SphI flanking
MO610	TCTAGCTAGCCCCGGGATCCACC	5' primer for amplifying Polylinker_DsRed and adding NheI flanking
MO574	CACCTGTTCCTGTAGGCATGC	5' primer for amplifying barcodes from reporter construct for adaptor ligation
MO575	TATTACAATTGTAGCCAGAAGTCAGATGCTCAAG	3' primer for amplifying barcodes from reporter construct for adaptor ligation
MO576	AATGATACGGCGACCACCGAGATCTACACTCTTTCCCTACACGACGCTCTTCCGATCTGCTCGATCAT*G	F P1 adaptor with SphI CATG overhang and multiplex barcode GCTCGAT, compatible with MO582
MO577	AATGATACGGCGACCACCGAGATCTACACTCTTTCCCTACACGACGCTCTTCCGATCTTAGACTATCAT*G	F P1 adaptor with SphI CATG overhang and multiplex barcode TAGACTAT, compatible with MO583
MO578	AATGATACGGCGACCACCGAGATCTACACTCTTTCCCTACACGACGCTCTTCCGATCTCGCTACCCTCAT*G	F P1 adaptor with SphI CATG overhang and multiplex barcode CGCTACCCT, compatible with MO584
MO579	AATGATACGGCGACCACCGAGATCTACACTCTTTCCCTACACGACGCTCTTCCGATCTATAGTGGACACAT*G	F P1 adaptor with SphI CATG overhang and multiplex barcode ATAGTGGACA, compatible with MO585
MO582	/5Phos/ATCGAGCAGATCGGAAGAGCGTCGTGTAGGGAAAGAGTGTAGATCTCGGTGGTCGCCGTATCATT	R P1 adaptor with SphI CATG overhang and multiplex barcode GCTCGAT, compatible with MO576
MO583	/5Phos/ATAGTCTAAGATCGGAAGAGCGTCGTGTAGGGAAAGAGTGTAGATCTCGGTGGTCGCCGTATCATT	R P1 adaptor with SphI CATG overhang and multiplex barcode TAGACTAT, compatible with MO577
MO584	/5Phos/AGGGTAGCGAGATCGGAAGAGCGTCGTGTAGGGAAAGAGTGTAGATCTCGGTGGTCGCCGTATCATT	R P1 adaptor with SphI CATG overhang and multiplex barcode CGCTACCCT, compatible with MO578
MO585	/5Phos/TGTCCACTATAGATCGGAAGAGCGTCGTGTAGGGAAAGAGTGTAGATCTCGGTGGTCGCCGTATCATT	R P1 adaptor with SphI CATG overhang and multiplex barcode ATAGTGGACA, compatible with MO579
PE2_SIC69_EcoRI_F	/5Phos/A*ATTAGATCGGAAGAGCACACGTCTGAACTCCAGTCACAGCGTGCCCATCTCGTATGCCGTCTTCTGCTTG	F PE2 adaptor with index GGGCACGCT, compatible with PE2_SIC69_R
PE2_SIC69_R	CAAGCAGAAGACGGCATACGAGATGGGCACGCTGTGACTGGAGTTCAGACGTGTGCTCTTCCGATCT	R PE2 adaptor with index GGGCACGCT, compatible with PE2_SIC69_EcoRI_F
PE2_EcoRI_Ind71_F	/5Phos/A*ATTAGATCGGAAGAGCACACGTCTGAACTCCAGTCACTGGGTTCGAATCTCGTATGCCGTCTTCTGCTTG	F PE2 adaptor with index TCGAACCCA, compatible with PE2_EcoRI_Ind71_R
PE2_EcoRI_Ind71_R	CAAGCAGAAGACGGCATACGAGATTCGAACCCAGTGACTGGAGTTCAGACGTGTGCTCTTCCGATCT	R PE2 adaptor with index TCGAACCCA, compatible with PE2_EcoRI_Ind71_F
MO588	AATGATACGGCGACCACCGAG	F Primer for Illumina enrichment PCR
MO589	CAAGCAGAAGACGGCATACGA	R Primer for Illumina enrichment PCR
BC_CRX_Nested_F	GTGGAGCAGTACGAGCG	5' primer for amplifying barcodes from reporter construct to tail on adaptors
BC_CRX_R	TAGCCAGAAGTCAGATGCTCAAG	3' primer for amplifying barcodes from reporter construct to tail on adaptors
P1_inner_A	ACGACGCTCTTCCGATCTGCTCGATCACCTGTTCCTGTAG	F primer to tail on P1 adaptor with multiplex barcode GCTCGAT
P1_inner_B	ACGACGCTCTTCCGATCTTAGACTATCACCTGTTCCTGTAG	F primer to tail on P1 adaptor with multiplex barcode TAGACTAT
P1_inner_C	ACGACGCTCTTCCGATCTCGCTACCCTCACCTGTTCCTGTAG	F primer to tail on P1 adaptor with multiplex barcode CGCTACCCT
P1_inner_D	ACGACGCTCTTCCGATCTATAGTGGACACACCTGTTCCTGTAG	F primer to tail on P1 adaptor with multiplex barcode ATAGTGGACA
P1_inner_nested_rev	GTGACTGGAGTTCAGACGTGTGCTCTTCCGATCTGGCTTCATGATGTCC	R primer for tailing on P1 adaptors
P1_outer	AATGATACGGCGACCACCGAGATCTACACTCTTTCCCTACACGACGCTCTTCCGATCT	F primer for tailing on PE2 adaptors
PE2_outer_SIC69	CAAGCAGAAGACGGCATACGAGATGGGCACGCTGTGACTGGAGTTCAGACGTG	R primer to tail on PE2 adaptor with index GGGCACGCT
PE2_outer_SIC70	CAAGCAGAAGACGGCATACGAGATTAGGGACATGTGACTGGAGTTCAGACGTG	R primer to tail on PE2 adaptor with index TAGGGACAT
